# Supplementary material for: Study of Holtermanniella wattica, Leucosporidium creatinivorum, Naganishia adeliensis, Solicoccozyma aeria, and Solicoccozyma terricola for their lipogenic aptitude from different carbon sources
Source: PubMed Central journal article supplement (PMC5126845; doi:10.1186/s13068-016-0672-1), 2016-11-28
Supplement: 13068_2016_672_MOESM1_ESM.pdf [file 13068_2016_672_MOESM1_ESM.pdf]

## Additional file 1

Salient information on all yeasts used in this study.

| DBVPG accession number | Species                   | Isolation source                                        | Isolation Locality                       | Optimal growth temperature | Phylum     |
|------------------------|---------------------------|---------------------------------------------------------|------------------------------------------|----------------------------|------------|
| 4325                   | <i>Candida catenulata</i> | frozen mushrooms                                        | Italy                                    | 25°C                       | Ascomycota |
| 3747                   | <i>Candida intermedia</i> | artichokes hearts under oil                             | S. Benedetto del Tronto, Italy           | 25°C                       | Ascomycota |
| 3186; 3187             | <i>Candida magnoliae</i>  | flowers                                                 | Venarotta, Ascoli Piceno, Italy          | 25°C                       | Ascomycota |
| 3188                   | <i>Candida magnoliae</i>  | flowers                                                 | Perugia, Italy                           | 25°C                       | Ascomycota |
| 3834                   | <i>Candida magnoliae</i>  | fodder yeast                                            | Italy                                    | 25°C                       | Ascomycota |
| 4327; 4409             | <i>Candida norvegica</i>  | sea water                                               | Italy                                    | 25°C                       | Ascomycota |
| 4624; 4636             | <i>Candida norvegica</i>  | soil at 850 m alt., 2 cm depth                          | Bromide Oklahoma, USA                    | 25°C                       | Ascomycota |
| 4467                   | <i>Candida oleophila</i>  | mandarine orange                                        | Italy                                    | 25°C                       | Ascomycota |
| 4547                   | <i>Candida oleophila</i>  | immature fruit of <i>Rhipsalis cassutha</i> , Cactaceae | Botanical garden, Rio de Janeiro, Brazil | 25°C                       | Ascomycota |
| 4612                   | <i>Candida pararugosa</i> | sea water                                               | Italy                                    | 25°C                       | Ascomycota |
| 4660 - 4664            | <i>Candida saitoana</i>   | epicarp of black truffle, <i>Tuber melanosporum</i>     | Fabriano, Ancona, Italy                  | 25°C                       | Ascomycota |

|                  |                             | Vitt.                                                                  |                                                |      |            |
|------------------|-----------------------------|------------------------------------------------------------------------|------------------------------------------------|------|------------|
| 4856             | <i>Candida saitoana</i>     | cavern soil                                                            | Grotta del Vento, Marche, Italy                | 25°C | Ascomycota |
| 4951             | <i>Candida saitoana</i>     | commercial compost, end of process, 3.5 months ca                      | Pietramelina, Perugia, Italy                   | 25°C | Ascomycota |
| 3744; 3745       | <i>Candida sake</i>         | soil                                                                   | Bottenangen, Sweden                            | 25°C | Ascomycota |
| 4625             | <i>Candida sake</i>         | soil at 850 m alt., 2 cm depth                                         | Bromide Oklahoma, USA                          | 25°C | Ascomycota |
| 4882; 4883; 4885 | <i>Candida sake</i>         | surface of Tuber mescutericum                                          | Italy                                          | 25°C | Ascomycota |
| 4648; 4649       | <i>Candida santamariae</i>  | soil around <i>Corylus avellana</i> in a truffle field, Tuber aestivum | Volperino, Perugia, Italy                      | 25°C | Ascomycota |
| 5182             | <i>Candida santamariae</i>  | supraglacial sediments                                                 | Calderone glacier, Gran Sasso, Abruzzo, Italy  | 25°C | Ascomycota |
| 5397 - 5399      | <i>Candida santamariae</i>  | morainic soil                                                          | Miage glacier, Mont Blanc, Italian Alps, Italy | 25°C | Ascomycota |
| 3724 - 3727      | <i>Candida vartiovaarae</i> | soil                                                                   | Viik, Helsinki, Finland                        | 25°C | Ascomycota |
| 3414; 3415       | <i>Candida versatilis</i>   | milk                                                                   | Italy                                          | 25°C | Ascomycota |
| 3512             | <i>Candida versatilis</i>   |                                                                        |                                                | 25°C | Ascomycota |

|                   |                                |                     |                                 |      |            |
|-------------------|--------------------------------|---------------------|---------------------------------|------|------------|
| 3731              | <i>Candida versatilis</i>      | ensiled olive husks | Perugia, Italy                  | 25°C | Ascomycota |
| 4853              | <i>Candida versatilis</i>      | cavern soil         | Grotta del Vento, Marche, Italy | 25°C | Ascomycota |
| 3952; 3953        | <i>Candida zeylanoides</i>     | natural rennet      | Italy                           | 25°C | Ascomycota |
| 4137 - 4140       | <i>Candida zeylanoides</i>     | grape must          | Slovenia                        | 25°C | Ascomycota |
| 3417              | <i>Citeromyces matritensis</i> | milk                | Perugia, Italy                  | 25°C | Ascomycota |
| 7088; 7089        | <i>Clavispora opuntiae</i>     | Opuntia sp.         | Los Pirpinitos, Argentina       | 25°C | Ascomycota |
| 3177; 3420        | <i>Cyberlindnera jadinii</i>   | flowers             | Venarotta, Ascoli Piceno, Italy | 25°C | Ascomycota |
| 3201; 3202; 3738  | <i>Cyberlindnera jadinii</i>   |                     |                                 | 25°C | Ascomycota |
| 3344              | <i>Cyberlindnera jadinii</i>   |                     | Etna, Sicily, Italy             | 25°C | Ascomycota |
| 3431; 3432        | <i>Cyberlindnera jadinii</i>   |                     | ex Yugoslavia                   | 25°C | Ascomycota |
| 3709; 3710        | <i>Cyberlindnera jadinii</i>   |                     | Fumane, Verona, Italy           | 25°C | Ascomycota |
| 3837              | <i>Cyberlindnera jadinii</i>   | flowers             |                                 | 25°C | Ascomycota |
| 3124; 3125 - 3130 | <i>Cyberlindnera saturnus</i>  | soil                | The Netherlands                 | 25°C | Ascomycota |
| 3671              | <i>Cyberlindnera saturnus</i>  | soil                | Hyytiala, Finland               | 25°C | Ascomycota |

|                            |                                |                                                     |                                         |      |            |
|----------------------------|--------------------------------|-----------------------------------------------------|-----------------------------------------|------|------------|
| 4561                       | <i>Cyberlindnera saturnus</i>  | flower of<br>Compositae                             | Pao da Fome,<br>Pedra Branca,<br>Brazil | 25°C | Ascomycota |
| 4889                       | <i>Cyberlindnera saturnus</i>  | surface of <i>Tuber<br/>imelaia</i>                 | Italy                                   | 25°C | Ascomycota |
| 2507; 3485                 | <i>Debaryomyces hansenii</i>   |                                                     |                                         | 25°C | Ascomycota |
| 3326; 3328 -<br>3332       | <i>Debaryomyces hansenii</i>   | Limburger<br>cheese                                 | Wageningen,<br>The Netherlands          | 25°C | Ascomycota |
| 3410                       | <i>Debaryomyces hansenii</i>   |                                                     | ex Yugoslavia                           | 25°C | Ascomycota |
| 3419                       | <i>Debaryomyces hansenii</i>   | milk                                                | Italy                                   | 25°C | Ascomycota |
| 3682 - 3685;<br>3687; 3688 | <i>Debaryomyces hansenii</i>   | soil                                                | Viik, Helsinki,<br>Finland              | 25°C | Ascomycota |
| 3978; 3979                 | <i>Debaryomyces hansenii</i>   | caverns                                             | Italy                                   | 25°C | Ascomycota |
| 4276                       | <i>Debaryomyces hansenii</i>   | human oral<br>cavity                                | Perugia, Italy                          | 25°C | Ascomycota |
| 3145 - 3147                | <i>Debaryomyces hansenii</i>   | sausages                                            | Italy                                   | 25°C | Ascomycota |
| 3241 - 3246                | <i>Geotrichum candidum</i>     | Limburger<br>cheese                                 | Wageningen,<br>The Netherlands          | 25°C | Ascomycota |
| 4350                       | <i>Geotrichum candidum</i>     | sea water                                           | Italy                                   | 25°C | Ascomycota |
| 3247; 3249;<br>3250        | <i>Magnusiomyces capitatus</i> | Limburger<br>cheese                                 | The Netherlands                         | 25°C | Ascomycota |
| 4541                       | <i>Hyphopichia burtonii</i>    | flower of<br><i>Miconia</i> sp.,<br>Milistomataceae | Angra dos Reis,<br>Brazil               | 25°C | Ascomycota |

|                             |                                |                                  |                             |      |            |
|-----------------------------|--------------------------------|----------------------------------|-----------------------------|------|------------|
| 6309; 6310                  | <i>Kazachstania africana</i>   |                                  |                             | 25°C | Ascomycota |
| 3191 - 3193                 | <i>Kazachstania exigua</i>     | Limburger cheese                 | Maastricht, The Netherlands | 25°C | Ascomycota |
| 4384; 4385                  | <i>Kazachstania exigua</i>     | sea water                        | Italy                       | 25°C | Ascomycota |
| 3423                        | <i>Kluyveromyces lactis</i>    | milk                             | Italy                       | 25°C | Ascomycota |
| 3882; 3912                  | <i>Kluyveromyces lactis</i>    | phlegm of a tuberculosis patient | Perugia, Italy              | 25°C | Ascomycota |
| 6030                        | <i>Kluyveromyces lactis</i>    | sputum                           | Spain                       | 25°C | Ascomycota |
| 4245                        | <i>Kluyveromyces lactis</i>    | fodder additive "Zymoyeast"      | Torino, Italy               | 25°C | Ascomycota |
| 3084; 3211                  | <i>Kluyveromyces marxianus</i> |                                  |                             | 25°C | Ascomycota |
| 3391; 3392                  | <i>Kluyveromyces marxianus</i> | pharynx mucous                   | Perugia, Italy              | 25°C | Ascomycota |
| 3436                        | <i>Kluyveromyces marxianus</i> | milk                             | Italy                       | 25°C | Ascomycota |
| 3748                        | <i>Kluyveromyces marxianus</i> | mozzarella cheese                | Perugia, Italy              | 25°C | Ascomycota |
| 3925 - 3929;<br>3939 - 3941 | <i>Kluyveromyces marxianus</i> | natural rennet                   | Italy                       | 25°C | Ascomycota |
| 4241; 4243;<br>4246         | <i>Kluyveromyces marxianus</i> | food additive                    | Torino, Italy               | 25°C | Ascomycota |
| 3362 - 3368                 | <i>Kodamaea ohmeri</i>         | flowers                          | Perugia, Italy              | 25°C | Ascomycota |

|                             |                              |                                      |                                          |      |            |
|-----------------------------|------------------------------|--------------------------------------|------------------------------------------|------|------------|
| 3437                        | <i>Kodamaea ohmeri</i>       | milk                                 | Perugia, Italy                           | 25°C | Ascomycota |
| 3438                        | <i>Kodamaea ohmeri</i>       |                                      | Capoterra,<br>Sardinia, Italy            | 25°C | Ascomycota |
| 3439                        | <i>Kodamaea ohmeri</i>       | grape must                           | Greece                                   | 25°C | Ascomycota |
| 3227; 3228                  | <i>Kregervanrija fluxuum</i> | soil                                 | Italy                                    | 25°C | Ascomycota |
| 3229 - 3232                 | <i>Kregervanrija fluxuum</i> |                                      |                                          | 25°C | Ascomycota |
| 3761                        | <i>Kregervanrija fluxuum</i> | artichokes hearts<br>under oil       | Montalto di<br>Castro, Viterbo,<br>Italy | 25°C | Ascomycota |
| 3765                        | <i>Kregervanrija fluxuum</i> | ensiled olive and<br>tomato residues | Italy                                    | 25°C | Ascomycota |
| 4048                        | <i>Kregervanrija fluxuum</i> | grape must                           | ex Yugoslavia                            | 25°C | Ascomycota |
| 4049                        | <i>Kregervanrija fluxuum</i> | grape must                           | Verona, Italy                            | 25°C | Ascomycota |
| 4141 - 4146                 | <i>Kregervanrija fluxuum</i> | grape must                           | Slovenia                                 | 25°C | Ascomycota |
| 3343                        | <i>Kuraishia capsulata</i>   | flowers                              | Perugia, Italy                           | 25°C | Ascomycota |
| 3674 - 3681;<br>3721 - 3723 | <i>Kuraishia capsulata</i>   | soil                                 | Hyytiala,<br>Finland                     | 25°C | Ascomycota |
| 3103 - 3107                 | <i>Lachancea kluyveri</i>    | soil                                 | Italy                                    | 25°C | Ascomycota |
| 3108 - 3110                 | <i>Lachancea kluyveri</i>    | soil                                 | The Netherlands                          | 25°C | Ascomycota |

|             |                                 |         |                                       |      |            |
|-------------|---------------------------------|---------|---------------------------------------|------|------------|
| 3452 - 3454 | <i>Lachancea kluyveri</i>       | soil    | Ultuna, Sweden                        | 25°C | Ascomycota |
| 3470; 3785  | <i>Lachancea kluyveri</i>       | soil    | Okana, Spain                          | 25°C | Ascomycota |
| 4003 - 4005 | <i>Lachancea kluyveri</i>       | caverns | Italy                                 | 25°C | Ascomycota |
| 3174        | <i>Lachancea thermotolerans</i> |         |                                       | 25°C | Ascomycota |
| 3785; 3395  | <i>Lachancea thermotolerans</i> |         | Delianova,<br>Sardinia, Italy         | 25°C | Ascomycota |
| 3418        | <i>Lachancea thermotolerans</i> | milk    | Italy                                 | 25°C | Ascomycota |
| 3464; 3465  | <i>Lachancea thermotolerans</i> | grapes  | Valdepenas, La<br>Mancha, Spain       | 25°C | Ascomycota |
| 3466 - 3468 | <i>Lachancea thermotolerans</i> | grapes  | La Encomienda,<br>La Mancha,<br>Spain | 25°C | Ascomycota |
| 3469        | <i>Lachancea thermotolerans</i> | grapes  | Manzanares, La<br>Mancha, Spain       | 25°C | Ascomycota |
| 3597; 3598  | <i>Lachancea thermotolerans</i> |         | Illasi, Verona,<br>Italy              | 25°C | Ascomycota |
| 3599        | <i>Lachancea thermotolerans</i> |         | Soave, Verona,<br>Italy               | 25°C | Ascomycota |
| 3600        | <i>Lachancea thermotolerans</i> |         | Aguilar,<br>Cordoba, Spain            | 25°C | Ascomycota |
| 3601 - 3603 | <i>Lachancea thermotolerans</i> |         | Moriles Altos,<br>Cordoba, Spain      | 25°C | Ascomycota |
| 3604; 3605  | <i>Lachancea thermotolerans</i> |         | Sierra Montilla,<br>Cordoba, Spain    | 25°C | Ascomycota |

|                      |                                  |                        |                                       |      |            |
|----------------------|----------------------------------|------------------------|---------------------------------------|------|------------|
| 6193; 6637           | <i>Lipomyces starkeyi</i>        | soil                   | USA                                   | 25°C | Ascomycota |
| 3247; 3249 -<br>3253 | <i>Magnusiomyces capitatus</i>   | Limburger<br>cheese    | The Netherlands                       | 25°C | Ascomycota |
| 3158                 | <i>Magnusiomyces magnusii</i>    | sausages               | Italy                                 | 25°C | Ascomycota |
| 3009                 | <i>Metschnikowia pulcherrima</i> | grape must             | Umbria, Italy                         | 25°C | Ascomycota |
| 3015                 | <i>Metschnikowia pulcherrima</i> | grape must             | Chianti, Italy                        | 25°C | Ascomycota |
| 3032 - 3034          | <i>Metschnikowia pulcherrima</i> | grape must             | Lucera, Italy                         | 25°C | Ascomycota |
| 3041                 | <i>Metschnikowia pulcherrima</i> | cherris                | Italy                                 | 25°C | Ascomycota |
| 3042                 | <i>Metschnikowia pulcherrima</i> | sour black<br>cherries | Italy                                 | 25°C | Ascomycota |
| 3043                 | <i>Metschnikowia pulcherrima</i> | grape must             | Isola d'Elba,<br>Toscana, Italy       | 25°C | Ascomycota |
| 3086                 | <i>Metschnikowia pulcherrima</i> | grape must             | Trentino, Italy                       | 25°C | Ascomycota |
| 3356 - 3359          | <i>Metschnikowia reukaufii</i>   | flowers                | Venarotta,<br>Ascoli Piceno,<br>Italy | 25°C | Ascomycota |
| 3838; 3839           | <i>Metschnikowia reukaufii</i>   | flowers                | Italy                                 | 25°C | Ascomycota |
| 3630 - 3633;<br>3635 | <i>Millerozyma farinosa</i>      | soil                   | Teisko, Finland                       | 25°C | Ascomycota |
| 4018                 | <i>Millerozyma farinosa</i>      | wine                   | Italy                                 | 25°C | Ascomycota |



|                             |                                    |                                                                            |                                 |      |            |
|-----------------------------|------------------------------------|----------------------------------------------------------------------------|---------------------------------|------|------------|
| 3728 - 3730;<br>3732 - 3735 | <i>Nakazawaea wickerhamii</i>      | cavern soil                                                                | Grotta del Vento, Marche, Italy | 25°C | Ascomycota |
| 3669; 3670;<br>3672; 3673   | <i>Ogataea minuta</i>              | soil                                                                       | Hyytiala, Finland               | 25°C | Ascomycota |
| 4516 - 4518                 | <i>Ogataea polimorpha</i>          |                                                                            |                                 | 25°C | Ascomycota |
| 3807 - 3809                 | <i>Pichia fermentans</i>           | soil                                                                       |                                 | 25°C | Ascomycota |
| 4359; 4360                  | <i>Pichia fermentans</i>           | frozen fava beans                                                          | Italy                           | 25°C | Ascomycota |
| 4361 - 4363                 | <i>Pichia fermentans</i>           | sea water                                                                  | Italy                           | 25°C | Ascomycota |
| 3628; 3629                  | <i>Pichia fermentans</i>           | soil                                                                       | Teisko, Finland                 | 25°C | Ascomycota |
| 3506                        | <i>Priceomyces carsonii</i>        |                                                                            |                                 | 25°C | Ascomycota |
| 4526; 4527                  | <i>Saturnispora silvae</i>         | Vriesea friburgensis                                                       | Tijuca forest, Brazil           | 25°C | Ascomycota |
| 4549                        | <i>Schwanniomyces etchellsii</i>   | exudate of <i>Eriobotrya japonica</i> , Rosaceae                           | Tijuca forest, Brazil           | 25°C | Ascomycota |
| 3509; 3510                  | <i>Schwanniomyces occidentalis</i> | soil                                                                       | Aranjuez, Spain                 | 25°C | Ascomycota |
| 4916                        | <i>Schwanniomyces occidentalis</i> | root of <i>Quercus pubescens</i> in a truffle field, <i>Tuber aestivum</i> | Volperino, Perugia, Italy       | 25°C | Ascomycota |
| 3690 - 3694;<br>3696        | <i>Schwanniomyces polymorphus</i>  | soil                                                                       | Teisko, Finland                 | 25°C | Ascomycota |

|                      |                                   |                                                                     |                                                         |      |               |
|----------------------|-----------------------------------|---------------------------------------------------------------------|---------------------------------------------------------|------|---------------|
| 3697; 3699 -<br>3701 | <i>Schwanniomyces polymorphus</i> | soil                                                                | Hyytiala,<br>Finland                                    | 25°C | Ascomycota    |
| 4944                 | <i>Schwanniomyces polymorphus</i> | <i>Tuber aestivum</i><br>associated with<br><i>Corylus avellana</i> | Volperino,<br>Perugia, Italy                            | 25°C | Ascomycota    |
| 4122; 4124;<br>4126  | <i>Starmerella bombicola</i>      | grape must                                                          | Slovenia                                                | 25°C | Ascomycota    |
| 3711                 | <i>Starmerella bombicola</i>      |                                                                     | Ruedos Aguilar,<br>Cordoba, Spain                       | 25°C | Ascomycota    |
| 3016                 | <i>Zygosaccharomyces bisporus</i> |                                                                     | Colli Romani,<br>Lazio, Italy                           | 25°C | Ascomycota    |
| 3018                 | <i>Zygosaccharomyces bisporus</i> |                                                                     |                                                         | 25°C | Ascomycota    |
| 4372; 4373           | <i>Buckleyzyma aurantiaca</i>     | sea water                                                           | Italy                                                   | 25°C | Basidiomycota |
| 4606; 4608           | <i>Buckleyzyma aurantiaca</i>     | flower of<br>Compositae                                             | Botanical<br>garden, Rio de<br>Janiero, Brazil          | 25°C | Basidiomycota |
| 4607                 | <i>Buckleyzyma aurantiaca</i>     | <i>Trigona</i> sp.,<br>Apidae                                       | Botanical<br>garden, Rio de<br>Janiero, Brazil          | 25°C | Basidiomycota |
| 4609; 4610           | <i>Buckleyzyma aurantiaca</i>     | flower of <i>Piper</i><br><i>aduncum</i>                            | Botanical<br>garden, Rio de<br>Janiero, Brazil          | 25°C | Basidiomycota |
| 4320; 4321           | <i>Bullera alba</i>               | sea water                                                           | Italy                                                   | 25°C | Basidiomycota |
| 4614                 | <i>Bullera alba</i>               | soil at 850 m<br>alt., 2 cm depth                                   | Bromide<br>Oklahoma, USA                                | 25°C | Basidiomycota |
| 5297                 | <i>Bullera alba</i>               | supraglacial<br>sediments                                           | Miage glacier,<br>Mont Blanc,<br>Italian Alps,<br>Italy | 25°C | Basidiomycota |

|                        |                                         |                                           |                                                                          |      |               |
|------------------------|-----------------------------------------|-------------------------------------------|--------------------------------------------------------------------------|------|---------------|
| 5438                   | <i>Bullera alba</i>                     | snow with superficial sediment            | Helbronner peak, Mont Blanc, Italian Alps, Italy                         | 25°C | Basidiomycota |
| 10090                  | <i>Cutaneotrichosporon moniliiforme</i> | Soil close to juniper tree, depth: 10 cm. | Constantine, Algeria                                                     | 20°C | Basidiomycota |
| 4724                   | <i>Cystobasidium laryngis</i>           | subglacial sediments                      | Sforzellina glacier, Ortles Cevedale group, Italian Alps, Sondrio, Italy | 25°C | Basidiomycota |
| 4765                   | <i>Cystobasidium laryngis</i>           | glacial ice                               | Sforzellina glacier, Ortles Cevedale group, Italian Alps, Sondrio, Italy | 25°C | Basidiomycota |
| 4772; 4773             | <i>Cystobasidium laryngis</i>           | glacial ice                               | Forni glacier, Ortles Cevedale group, Italian Alps, Sondrio, Italy       | 25°C | Basidiomycota |
| 5035                   | <i>Cystobasidium laryngis</i>           | superficial glacial sediment              | Calderone glacier, Gran Sasso, Abruzzo, Italy                            | 25°C | Basidiomycota |
| 5084; 5088; 5098; 5151 | <i>Cystobasidium laryngis</i>           | deep piping glacial sediments             | Calderone glacier, Gran Sasso, Abruzzo, Italy                            | 25°C | Basidiomycota |
| 5287                   | <i>Cystobasidium laryngis</i>           | morainic soil                             | Miage glacier, Mont Blanc, Italian Alps, Italy                           | 25°C | Basidiomycota |
| 5292; 5363; 5366       | <i>Cystobasidium laryngis</i>           | supraglacial sediments                    | Miage glacier, Mont Blanc, Italian Alps, Italy                           | 25°C | Basidiomycota |
| 3234                   | <i>Cystobasidium minutum</i>            |                                           | Calabria, Italy                                                          | 25°C | Basidiomycota |

|                                                    |                                              |                                          |                                                        |      |               |
|----------------------------------------------------|----------------------------------------------|------------------------------------------|--------------------------------------------------------|------|---------------|
| 4374                                               | <i>Cystobasidium minutum</i>                 | sea water                                | Italy                                                  | 25°C | Basidiomycota |
| 4375                                               | <i>Cystobasidium minutum</i>                 | frozen fish                              | Italy                                                  | 25°C | Basidiomycota |
| 4562                                               | <i>Cystobasidium minutum</i>                 | flower of<br>Acanthaceae                 | Angra dos Reis,<br>Brazil                              | 25°C | Basidiomycota |
| 5227                                               | <i>Cystobasidium minutum</i>                 | soil near the<br>glacier                 | E.Point, South<br>Valley,<br>Antarctica                | 25°C | Basidiomycota |
| 5230 - 5232;<br>5234                               | <i>Cystobasidium minutum</i>                 | ornithogenic soil                        | E.Point, South<br>Valley,<br>Antarctica                | 25°C | Basidiomycota |
| 4845                                               | <i>Cystofilobasidium capitatum</i>           | glacial melting<br>water                 | Calderone<br>glacier, Gran<br>Sasso, Abruzzo,<br>Italy | 20°C | Basidiomycota |
| 4985; 4987;<br>4991; 4997;<br>5002 - 5004;<br>5008 | <i>Cystofilobasidium capitatum</i>           | superficial<br>glacial melting<br>water  | Calderone<br>glacier, Gran<br>Sasso, Abruzzo,<br>Italy | 20°C | Basidiomycota |
| 5214                                               | <i>Cystofilobasidium capitatum</i>           | glacial melting<br>water                 | Calderone<br>glacier, Gran<br>Sasso, Abruzzo,<br>Italy | 20°C | Basidiomycota |
| 4296                                               | <i>Cystofilobasidium<br/>infirmominiatum</i> | winery surface                           | Bettona,<br>Perugia, Italy                             | 20°C | Basidiomycota |
| 4884                                               | <i>Cystofilobasidium<br/>infirmominiatum</i> | surface of <i>Tuber<br/>mescutericum</i> | Italy                                                  | 20°C | Basidiomycota |
| 5097                                               | <i>Filobasidium oeirense</i>                 | deep piping<br>glacial sediment          | Calderone<br>glacier, Gran<br>Sasso, Abruzzo,<br>Italy | 20°C | Basidiomycota |
| 5115                                               | <i>Filobasidium oeirense</i>                 | superficial<br>glacial melting<br>water  | Calderone<br>glacier, Gran<br>Sasso, Abruzzo,<br>Italy | 20°C | Basidiomycota |

|                                     |                               |                                   |                                                                                        |      |               |
|-------------------------------------|-------------------------------|-----------------------------------|----------------------------------------------------------------------------------------|------|---------------|
| 4988                                | <i>Filobasidium stepposum</i> | superficial glacial melting water | Calderone glacier, Gran Sasso, Abruzzo, Italy                                          | 20°C | Basidiomycota |
| 5222; 5223                          | <i>Filobasidium stepposum</i> | permafrost                        | Antarctic Dry Valleys, close to the Easter side of the Upper Victoria Lake, Antarctica | 20°C | Basidiomycota |
| 5432; 5463                          | <i>Filobasidium stepposum</i> | snow with superficial sediment    | Helbronner peak, Mont Blanc, Italian Alps, Italy                                       | 20°C | Basidiomycota |
| 5085; 5089; 5095; 5099; 5153 - 5156 | <i>Filobasidium wieringae</i> | deep piping glacial sediments     | Calderone glacier, Gran Sasso, Abruzzo, Italy                                          | 20°C | Basidiomycota |
| 5455; 5457                          | <i>Filobasidium wieringae</i> | snow with superficial sediment    | Helbronner peak, Mont Blanc, Italian Alps, Italy                                       | 20°C | Basidiomycota |
| 4841                                | <i>Glaciozyma martinii</i>    | supraglacial sediments            | Calderone glacier, Gran Sasso, Abruzzo, Italy                                          | 15°C | Basidiomycota |
| 8018                                | <i>Glaciozyma martinii</i>    | soil                              | Sothern Victoria land, Antarctica                                                      | 15°C | Basidiomycota |
| 4726                                | <i>Glaciozyma watsonii</i>    | subglacial sediments              | Forni glacier, Ortles Cevedale group, Italian Alps, Sondrio, Italy                     | 15°C | Basidiomycota |
| 4799; 4802                          | <i>Glaciozyma watsonii</i>    | subglacial sediments              | Sforzellina glacier, Ortles Cevedale group, Italian Alps, Sondrio, Italy               | 15°C | Basidiomycota |

|                                                               |                               |                        |                                                                          |      |               |
|---------------------------------------------------------------|-------------------------------|------------------------|--------------------------------------------------------------------------|------|---------------|
| 8014; 8015                                                    | <i>Glaciozyma watsonii</i>    | soil                   | Sothern Victoria land, Antarctica                                        | 15°C | Basidiomycota |
| 5194; 5196 - 5199; 5201; 5203                                 | <i>Goffeauzyma gastrica</i>   | supraglacial sediments | Calderone glacier, Gran Sasso, Abruzzo, Italy                            | 20°C | Basidiomycota |
| 5204 - 5206; 5208 - 5211                                      | <i>Goffeauzyma gastrica</i>   | ice                    | Calderone glacier, Gran Sasso, Abruzzo, Italy                            | 20°C | Basidiomycota |
| 5220                                                          | <i>Goffeauzyma gastrica</i>   | glacial melting water  | Calderone glacier, Gran Sasso, Abruzzo, Italy                            | 20°C | Basidiomycota |
| 5293 ; 5294                                                   | <i>Goffeauzyma gastrica</i>   | supraglacial sediments | Miage glacier, Mont Blanc, Italian Alps, Italy                           | 20°C | Basidiomycota |
| 5324; 5401                                                    | <i>Goffeauzyma gastrica</i>   | morainic soil          | Miage glacier, Mont Blanc, Italian Alps, Italy                           | 20°C | Basidiomycota |
| 5371; 5381                                                    | <i>Goffeauzyma gastrica</i>   | supraglacial sediments | Miage glacier, Mont Blanc, Italian Alps, Italy                           | 20°C | Basidiomycota |
| 4708 - 4710; 4712; 4714; 4733 - 4735; 4737; 4738; 4740 - 4749 | <i>Goffeauzyma gilvescens</i> | subglacial sediments   | Sforzellina glacier, Ortles Cevedale group, Italian Alps, Sondrio, Italy | 20°C | Basidiomycota |
| 4750                                                          | <i>Goffeauzyma gilvescens</i> | endoglacial sediments  | Forni glacier, Ortles Cevedale group, Italian Alps, Sondrio, Italy       | 20°C | Basidiomycota |
| 5924; 10045                                                   | <i>Goffeauzyma gilvescens</i> | supraglacial sediments | Miage glacier, Mont Blanc, Italian Alps, Italy                           | 20°C | Basidiomycota |

|                  |                                     |                                   |                                                                    |      |               |
|------------------|-------------------------------------|-----------------------------------|--------------------------------------------------------------------|------|---------------|
| 5965             | <i>Goffeauzyma gilvescens</i>       | glacial melting water (stagnant)  | Miage glacier, Mont Blanc, Italian Alps, Italy                     | 20°C | Basidiomycota |
| 10073            | <i>Goffeauzyma gilvescens</i>       | sediment                          | Miage glacier, Mont Blanc, Italian Alps, Italy                     | 20°C | Basidiomycota |
| 4837             | <i>Holtermanniella wattica</i>      | supraglacial sediments            | Calderone glacier, Gran Sasso, Abruzzo, Italy                      | 20°C | Basidiomycota |
| 5079             | <i>Holtermanniella wattica</i>      | deep piping glacial sediments     | Calderone glacier, Gran Sasso, Abruzzo, Italy                      | 20°C | Basidiomycota |
| 5282; 5353; 5408 | <i>Holtermanniella wattica</i>      | morainic soil                     | Miage glacier, Mont Blanc, Italian Alps, Italy                     | 20°C | Basidiomycota |
| 5411; 5421       | <i>Holtermanniella wattica</i>      | ice cores                         | Miage glacier, Mont Blanc, Italian Alps, Italy                     | 20°C | Basidiomycota |
| 5998             | <i>Holtermanniella wattica</i>      | supraglacial sediments            | Miage glacier, Mont Blanc, Italian Alps, Italy                     | 20°C | Basidiomycota |
| 4794             | <i>Leucosporidium creatinivorum</i> | supraglacial sediments            | Forni glacier, Ortles Cevedale group, Italian Alps, Sondrio, Italy | 20°C | Basidiomycota |
| 5217             | <i>Leucosporidium intermedium</i>   | glacial melting water             | Calderone glacier, Gran Sasso, Abruzzo, Italy                      | 20°C | Basidiomycota |
| 4867             | <i>Leucosporidium scottii</i>       | surface of <i>Tuber indicatum</i> | China                                                              | 20°C | Basidiomycota |

|                                    |                          |                                         |                                                                    |      |               |
|------------------------------------|--------------------------|-----------------------------------------|--------------------------------------------------------------------|------|---------------|
| 4979; 4990;<br>4994; 4999;<br>5000 | <i>Mrakia aquatica</i>   | superficial<br>glacial melting<br>water | Calderone<br>glacier, Gran<br>Sasso, Abruzzo,<br>Italy             | 20°C | Basidiomycota |
| 5179; 5180                         | <i>Mrakia cryoconiti</i> | supraglacial<br>sediments               | Calderone<br>glacier, Gran<br>Sasso, Abruzzo,<br>Italy             | 20°C | Basidiomycota |
| 5302                               | <i>Mrakia cryoconiti</i> | superficial<br>glacial melting<br>water | Miage glacier,<br>Mont Blanc,<br>Italian Alps,<br>Italy            | 20°C | Basidiomycota |
| 4977; 4983;<br>4995                | <i>Mrakia gelida</i>     | superficial<br>glacial melting<br>water | Calderone<br>glacier, Gran<br>Sasso, Abruzzo,<br>Italy             | 15°C | Basidiomycota |
| 5106                               | <i>Mrakia gelida</i>     | deep piping<br>glacial<br>sediments     | Calderone<br>glacier, Gran<br>Sasso, Abruzzo,<br>Italy             | 15°C | Basidiomycota |
| 5306; 5308,<br>5952; 5953          | <i>Mrakia gelida</i>     | glacial melting<br>water                | Miage glacier,<br>Mont Blanc,<br>Italian Alps,<br>Italy            | 15°C | Basidiomycota |
| 4728; 4762;<br>4790                | <i>Mrakia robertii</i>   | subglacial<br>sediments                 | Forni glacier,<br>Ortles Cevedale<br>group, Italian<br>Alps, Italy | 15°C | Basidiomycota |
| 5309                               | <i>Mrakia robertii</i>   | glacial melting<br>water                | Miage glacier,<br>Mont Blanc,<br>Italian Alps,<br>Italy            | 15°C | Basidiomycota |
| 5336; 5345                         | <i>Mrakia robertii</i>   | morainic soil                           | Miage glacier,<br>Mont Blanc,<br>Italian Alps,<br>Italy            | 15°C | Basidiomycota |
| 5922; 5923;<br>5926                | <i>Mrakia robertii</i>   | supraglacial<br>sediments               | Miage glacier,<br>Mont Blanc,<br>Italian Alps,<br>Italy            | 15°C | Basidiomycota |



|                                          |                              |                                                                                         |                                                         |      |               |
|------------------------------------------|------------------------------|-----------------------------------------------------------------------------------------|---------------------------------------------------------|------|---------------|
| 4819; 5187;<br>5193; 5195                | <i>Naganishia adeliensis</i> | supraglacial<br>sediments                                                               | Calderone<br>glacier, Gran<br>Sasso, Abruzzo,<br>Italy  | 20°C | Basidiomycota |
| 5081; 5149;<br>5152                      | <i>Naganishia adeliensis</i> | deep piping<br>glacial<br>sediments                                                     | Calderone<br>glacier, Gran<br>Sasso, Abruzzo,<br>Italy  | 20°C | Basidiomycota |
| 5275; 5299;<br>5300; 5321;<br>5338; 5394 | <i>Naganishia adeliensis</i> | morainic soil                                                                           | Miage glacier,<br>Mont Blanc,<br>Italian Alps,<br>Italy | 20°C | Basidiomycota |
| 5296; 5382                               | <i>Naganishia adeliensis</i> | supraglacial<br>sediments                                                               | Miage glacier,<br>Mont Blanc,<br>Italian Alps,<br>Italy | 20°C | Basidiomycota |
| 5967; 5973;<br>10001                     | <i>Naganishia adeliensis</i> | supraglacial<br>melting water                                                           | Miage glacier,<br>Mont Blanc,<br>Italian Alps,<br>Italy | 20°C | Basidiomycota |
| 10060                                    | <i>Naganishia adeliensis</i> | sediment                                                                                | Miage glacier,<br>Mont Blanc,<br>Italian Alps,<br>Italy | 20°C | Basidiomycota |
| 4910 - 4915                              | <i>Naganishia albida</i>     | truffle, <i>Tuber<br/>aestivum</i> ,<br>associated with<br><i>Quercus<br/>pubescens</i> | Volperino,<br>Perugia, Italy                            | 25°C | Basidiomycota |
| 4917 - 4919                              | <i>Naganishia albida</i>     | soil                                                                                    | Volperino,<br>Perugia, Italy                            | 25°C | Basidiomycota |
| 4939; 4940                               | <i>Naganishia albida</i>     | mycorrhizae of<br><i>Tuber aestivum</i><br>associated with<br><i>Corylus avellana</i>   | Volperino,<br>Perugia, Italy                            | 25°C | Basidiomycota |
| 4942                                     | <i>Naganishia albida</i>     | soil around<br><i>Corylus avellana</i><br>in a truffle field,<br><i>Tuber aestivum</i>  | Volperino,<br>Perugia, Italy                            | 25°C | Basidiomycota |

|                                                                           |                                    |                                         |                                                                                      |      |               |
|---------------------------------------------------------------------------|------------------------------------|-----------------------------------------|--------------------------------------------------------------------------------------|------|---------------|
| 3184                                                                      | <i>Naganishia albida</i>           | flowers                                 | Venarotta,<br>Ascoli Piceno,<br>Italy                                                | 25°C | Basidiomycota |
| 3190                                                                      | <i>Naganishia albida</i>           |                                         |                                                                                      | 25°C | Basidiomycota |
| 4345                                                                      | <i>Naganishia albida</i>           | sea water                               | Italy                                                                                | 25°C | Basidiomycota |
| 5270 - 5274;<br>5276 - 5278;<br>5281; 5283;<br>5314 - 5316;<br>5318; 5322 | <i>Naganishia antarctica</i>       | morainic soil                           | Miage glacier,<br>Mont Blanc,<br>Italian Alps,<br>Italy                              | 20°C | Basidiomycota |
| 4736                                                                      | <i>Naganishia vaughanmartinae</i>  | supraglacial<br>sediments               | Sforzellina<br>glacier, Ortles<br>Cevedale group,<br>Italian Alps,<br>Sondrio, Italy | 20°C | Basidiomycota |
| 4584; 4601                                                                | <i>Papiliotrema laurentii</i>      | blackberry,<br><i>Rubus</i> sp.         | Horco Molle,<br>Tucuman,<br>Argentina                                                | 25°C | Basidiomycota |
| 4586; 4588;<br>4592; 4596                                                 | <i>Papiliotrema laurentii</i>      | contaminated<br>water near a dam        | El Frontal Dam,<br>Sgo del Estero,<br>Argentina                                      | 25°C | Basidiomycota |
| 4593; 4594;<br>4600; 4602;<br>4603; 4605                                  | <i>Papiliotrema laurentii</i>      | red fruit                               | Horco Molle,<br>Tucuman,<br>Argentina                                                | 25°C | Basidiomycota |
| 4597; 4598                                                                | <i>Papiliotrema laurentii</i>      | Flores borravino                        | Horco Molle,<br>Tucuman,<br>Argentina                                                | 25°C | Basidiomycota |
| 5449                                                                      | <i>Papiliotrema laurentii</i>      | snow with<br>superficial<br>sediment    | Helbronner<br>peak, Mont<br>Blanc, Italian<br>Alps, Italy                            | 25°C | Basidiomycota |
| 5006                                                                      | <i>Rhodosporidiobolus colostri</i> | superficial<br>glacial melting<br>water | Calderone<br>glacier, Gran<br>Sasso, Abruzzo,<br>Italy                               | 20°C | Basidiomycota |

|            |                                    |                                                        |                                                |      |               |
|------------|------------------------------------|--------------------------------------------------------|------------------------------------------------|------|---------------|
| 5982       | <i>Rhodospiridiobolus colostri</i> | supraglacial melting water                             | Miage glacier, Mont Blanc, Italian Alps, Italy | 20°C | Basidiomycota |
| 3984; 3985 | <i>Rhodotorula glutinis</i>        | caverns                                                |                                                | 25°C | Basidiomycota |
| 3044; 4304 | <i>Rhodotorula glutinis</i>        |                                                        |                                                | 25°C | Basidiomycota |
| 3090       | <i>Rhodotorula glutinis</i>        | grape must                                             | Conegnano, Veneto, Italy                       | 25°C | Basidiomycota |
| 3235; 3236 | <i>Rhodotorula glutinis</i>        | Limburger cheese                                       | Wageningen, The Netherlands                    | 25°C | Basidiomycota |
| 3380       | <i>Rhodotorula glutinis</i>        | flowers                                                | Venarotta, Ascoli Piceno, Italy                | 25°C | Basidiomycota |
| 3442; 3443 | <i>Rhodotorula glutinis</i>        | milk                                                   | Italy                                          | 25°C | Basidiomycota |
| 4529; 4611 | <i>Rhodotorula glutinis</i>        | water of <i>Quesnelia quesneliana</i> , mangrove       | Coroa Grande, Brazil                           | 25°C | Basidiomycota |
| 4949; 4964 | <i>Rhodotorula glutinis</i>        | mature domestic compost                                | Perugia, Italy                                 | 25°C | Basidiomycota |
| 4958       | <i>Rhodotorula glutinis</i>        | commercial compost, 16 m into the process (Temp. 59°C) | Pietramelina, Perugia, Italy                   | 25°C | Basidiomycota |
| 4530       | <i>Rhodotorula glutinis</i>        | flower of Poaceae                                      | Tijuca forest, Brazil                          | 25°C | Basidiomycota |
| 4531       | <i>Rhodotorula glutinis</i>        | flower of <i>Pachystachys riedeliana</i> , Acanthaceae | Botanical garden, Rio de Janeiro, Brazil       | 25°C | Basidiomycota |

|                        |                                 |                                                               |                                          |      |               |
|------------------------|---------------------------------|---------------------------------------------------------------|------------------------------------------|------|---------------|
| 4620                   | <i>Rhodotorula graminis</i>     | soil at 850 m alt., 2 cm depth                                | Bromide Oklahoma, USA                    | 25°C | Basidiomycota |
| 4203                   | <i>Rhodotorula mucilaginosa</i> | vineyard soil                                                 | Italy                                    | 25°C | Basidiomycota |
| 4376                   | <i>Rhodotorula mucilaginosa</i> | frozen chicken                                                | Italy                                    | 25°C | Basidiomycota |
| 4377; 4408             | <i>Rhodotorula mucilaginosa</i> | sea water                                                     | Italy                                    | 25°C | Basidiomycota |
| 4378                   | <i>Rhodotorula mucilaginosa</i> | frozen fish                                                   | Italy                                    | 25°C | Basidiomycota |
| 4618; 4629             | <i>Rhodotorula mucilaginosa</i> | soil at 850 m alt., 2 cm depth                                | Bromide Oklahoma, USA                    | 25°C | Basidiomycota |
| 4898                   | <i>Rhodotorula mucilaginosa</i> | surface of <i>Tuber indicatum</i>                             | China                                    | 25°C | Basidiomycota |
| 4920; 4945 - 4947      | <i>Rhodotorula mucilaginosa</i> | <i>Tuber aestivum</i> associated with <i>Corylus avellana</i> | Volperino, Perugia, Italy                | 25°C | Basidiomycota |
| 4950; 4952; 4956; 4957 | <i>Rhodotorula mucilaginosa</i> | mature domestic compost                                       | Perugia, Italy                           | 25°C | Basidiomycota |
| 4962; 4963             | <i>Rhodotorula mucilaginosa</i> | commercial compost, 15 m into the process (Temp. 63°C)        | Pietramelina, Perugia, Italy             | 25°C | Basidiomycota |
| 5235                   | <i>Rhodotorula mucilaginosa</i> | soil near the glacier                                         | E.Point, North Valley, Antarctica        | 25°C | Basidiomycota |
| 4466                   | <i>Rhodotorula mucilaginosa</i> | lemon skin                                                    | Italy                                    | 25°C | Basidiomycota |
| 4536                   | <i>Rhodotorula mucilaginosa</i> | flower of <i>Ixora coccinea</i> , Rubiaceae, infested by      | Botanical garden, Rio de Janeiro, Brazil | 25°C | Basidiomycota |

|             |                                 |                                                                                                                                             |                                                  |      |               |
|-------------|---------------------------------|---------------------------------------------------------------------------------------------------------------------------------------------|--------------------------------------------------|------|---------------|
|             |                                 | insects                                                                                                                                     |                                                  |      |               |
| 4669        | <i>Rhodotorula mucilaginosa</i> | epicarp of <i>Tuber magnatum</i> Pico                                                                                                       | Campello su Clitunno, Perugia, Italy             | 25°C | Basidiomycota |
| 3045        | <i>Rhodotorula mucilaginosa</i> | selected starter for cheese production                                                                                                      | Italy                                            | 25°C | Basidiomycota |
| 3237        | <i>Rhodotorula mucilaginosa</i> | grape must                                                                                                                                  | Calabria, Italy                                  | 25°C | Basidiomycota |
| 3238; 3239  | <i>Rhodotorula mucilaginosa</i> | Limburger cheese                                                                                                                            | Wageningen, The Netherlands                      | 25°C | Basidiomycota |
| 3381; 3382  | <i>Rhodotorula mucilaginosa</i> | flowers                                                                                                                                     | Venarotta, Ascoli Piceno, Italy                  | 25°C | Basidiomycota |
| 3383; 3384  | <i>Rhodotorula mucilaginosa</i> | flowers                                                                                                                                     | Perugia, Italy                                   | 25°C | Basidiomycota |
| 3444 - 3446 | <i>Rhodotorula mucilaginosa</i> | milk                                                                                                                                        | Italy                                            | 25°C | Basidiomycota |
| 3538        | <i>Rhodotorula mucilaginosa</i> | soil                                                                                                                                        | Ultuna, Sweden                                   | 25°C | Basidiomycota |
| 5839        | <i>Solicoccozyma aeria</i>      | soil close to plum tree, depth: 35 cm.<br>Agricultural soil: presence of important vegetation, some fallen fruit (plum) rotting and insects | District of Hamma Bouziane, Constantine, Algeria | 20°C | Basidiomycota |
| 5150        | <i>Solicoccozyma aeria</i>      | deep piping glacial sediments                                                                                                               | Calderone glacier, Gran Sasso, Abruzzo, Italy    | 20°C | Basidiomycota |

|                                                       |                                |                                                                                                          |                                                                    |      |               |
|-------------------------------------------------------|--------------------------------|----------------------------------------------------------------------------------------------------------|--------------------------------------------------------------------|------|---------------|
| 5291; 5367                                            | <i>Solicoccozyma aeria</i>     | supraglacial sediments                                                                                   | Miage glacier, Mont Blanc, Italian Alps, Italy                     | 20°C | Basidiomycota |
| 5690                                                  | <i>Solicoccozyma aeria</i>     | snow from trench                                                                                         | Helbronner peak, Mont Blanc, Italian Alps, Italy                   | 20°C | Basidiomycota |
| 10019                                                 | <i>Solicoccozyma aeria</i>     | supraglacial sediments                                                                                   | Miage glacier, Mont Blanc, Italian Alps, Italy                     | 20°C | Basidiomycota |
| 10094                                                 | <i>Solicoccozyma aeria</i>     | soil close to eucalyptus tree, depth: 10 cm. Forest soil: presence of important vegetation, some insects | Constantine, Algeria                                               | 20°C | Basidiomycota |
| 5344; 5403                                            | <i>Solicoccozyma terreus</i>   | morainic soil                                                                                            | Miage glacier, Mont Blanc, Italian Alps, Italy                     | 20°C | Basidiomycota |
| 4812; 4814                                            | <i>Solicoccozyma terricola</i> | subglacial sediments                                                                                     | Forni glacier, Ortles Cevedale group, Italian Alps, Sondrio, Italy | 20°C | Basidiomycota |
| 5280; 5311 - 5313; 5317; 5319; 5320; 5341; 5346; 5350 | <i>Solicoccozyma terricola</i> | morainic soil                                                                                            | Miage glacier, Mont Blanc, Italian Alps, Italy                     | 20°C | Basidiomycota |
| 5368; 5870; 5907; 5925; 10017                         | <i>Solicoccozyma terricola</i> | supraglacial sediments                                                                                   | Miage glacier, Mont Blanc, Italian Alps, Italy                     | 20°C | Basidiomycota |

|                                          |                                  |                                   |                                                                                        |      |               |
|------------------------------------------|----------------------------------|-----------------------------------|----------------------------------------------------------------------------------------|------|---------------|
| 5224                                     | <i>Sporobolomyces metaroseus</i> | permafrost                        | Antarctic Dry Valleys, close to the Easter side of the Upper Victoria Lake, Antarctica | 20°C | Basidiomycota |
| 4387                                     | <i>Sporobolomyces roseus</i>     | sea water                         | Italy                                                                                  | 25°C | Basidiomycota |
| 5010; 5018;<br>5020; 5022;<br>5029; 5120 | <i>Sporobolomyces roseus</i>     | superficial glacial sediment      | Calderone glacier, Gran Sasso, Abruzzo, Italy                                          | 25°C | Basidiomycota |
| 3254 - 3258                              | <i>Tausonia pullulans</i>        | Limburger cheese                  | The Netherlands                                                                        | 20°C | Basidiomycota |
| 4822; 4836;<br>5172                      | <i>Tausonia pullulans</i>        | supraglacial sediments            | Calderone glacier, Gran Sasso, Abruzzo, Italy                                          | 20°C | Basidiomycota |
| 4969; 4970;<br>4872; 5007                | <i>Tausonia pullulans</i>        | superficial glacial melting water | Calderone glacier, Gran Sasso, Abruzzo, Italy                                          | 20°C | Basidiomycota |
| 5105; 5108;<br>5170; 5171                | <i>Tausonia pullulans</i>        | deep piping glacial sediments     | Calderone glacier, Gran Sasso, Abruzzo, Italy                                          | 20°C | Basidiomycota |
| 5215                                     | <i>Tausonia pullulans</i>        | glacial melting water             | Calderone glacier, Gran Sasso, Abruzzo, Italy                                          | 20°C | Basidiomycota |
| 5298; 5871                               | <i>Tausonia pullulans</i>        | supraglacial sediments            | Miage glacier, Mont Blanc, Italian Alps, Italy                                         | 20°C | Basidiomycota |
| 5873                                     | <i>Tausonia pullulans</i>        | glacial melting water             | Miage glacier, Mont Blanc, Italian Alps, Italy                                         | 20°C | Basidiomycota |

|                                                             |                                 |                                                                               |                                                  |      |               |
|-------------------------------------------------------------|---------------------------------|-------------------------------------------------------------------------------|--------------------------------------------------|------|---------------|
| 5959                                                        | <i>Tausonia pullulans</i>       | glacial melting water (stagnant)                                              | Miage glacier, Mont Blanc, Italian Alps, Italy   | 20°C | Basidiomycota |
| 10065; 10070; 10071                                         | <i>Ustilentyloma graminis</i>   | sediment                                                                      | Miage glacier, Mont Blanc, Italian Alps, Italy   | 20°C | Basidiomycota |
| 4923 - 4838                                                 | <i>Vanrija humicola</i>         | <i>Tuber aestivum</i> associated with <i>Corylus avellana</i>                 | Volperino, Perugia, Italy                        | 25°C | Basidiomycota |
| 4941; 4943                                                  | <i>Vanrija humicola</i>         | soil around <i>Corylus avellana</i> in a truffle field, <i>Tuber aestivum</i> | Volperino, Perugia, Italy                        | 25°C | Basidiomycota |
| 5111                                                        | <i>Vishniacozyma tephrensis</i> | deep piping glacial sediment                                                  | Calderone glacier, Gran Sasso, Abruzzo, Italy    | 20°C | Basidiomycota |
| 5475                                                        | <i>Vishniacozyma tephrensis</i> | snow with superficial sediment                                                | Helbronner peak, Mont Blanc, Italian Alps, Italy | 20°C | Basidiomycota |
| 4826                                                        | <i>Vishniacozyma victoriae</i>  | <i>Tuber aestivum</i> associated with <i>Corylus avellana</i>                 | Volperino, Perugia, Italy                        | 20°C | Basidiomycota |
| 4830; 4835                                                  | <i>Vishniacozyma victoriae</i>  | deep piping glacial sediments                                                 | Calderone glacier, Gran Sasso, Abruzzo, Italy    | 20°C | Basidiomycota |
| 4965; 4967                                                  | <i>Vishniacozyma victoriae</i>  | superficial glacial melting water                                             | Calderone glacier, Gran Sasso, Abruzzo, Italy    | 20°C | Basidiomycota |
| 4968; 4973; 4978; 4986; 5013; 5015; 5017; 5055 - 5057; 5132 | <i>Vishniacozyma victoriae</i>  | superficial glacial melting water                                             | Calderone glacier, Gran Sasso, Abruzzo, Italy    | 20°C | Basidiomycota |



|                     |                                |               |                                                         |      |               |
|---------------------|--------------------------------|---------------|---------------------------------------------------------|------|---------------|
| 5207; 5212;<br>5301 | <i>Vishniacozyma victoriae</i> | ice           | Calderone<br>glacier, Gran<br>Sasso, Abruzzo,<br>Italy  | 20°C | Basidiomycota |
| 5354                | <i>Vishniacozyma victoriae</i> | morainic soil | Miage glacier,<br>Mont Blanc,<br>Italian Alps,<br>Italy | 20°C | Basidiomycota |
