# Supplementary material for: Study of Holtermanniella wattica, Leucosporidium creatinivorum, Naganishia adeliensis, Solicoccozyma aeria, and Solicoccozyma terricola for their lipogenic aptitude from different carbon sources
Source: PubMed Central journal article supplement (PMC5126845; doi:10.1186/s13068-016-0672-1), 2016-11-28

## Additional file 2

Flow chart figure reporting the workflow of the study

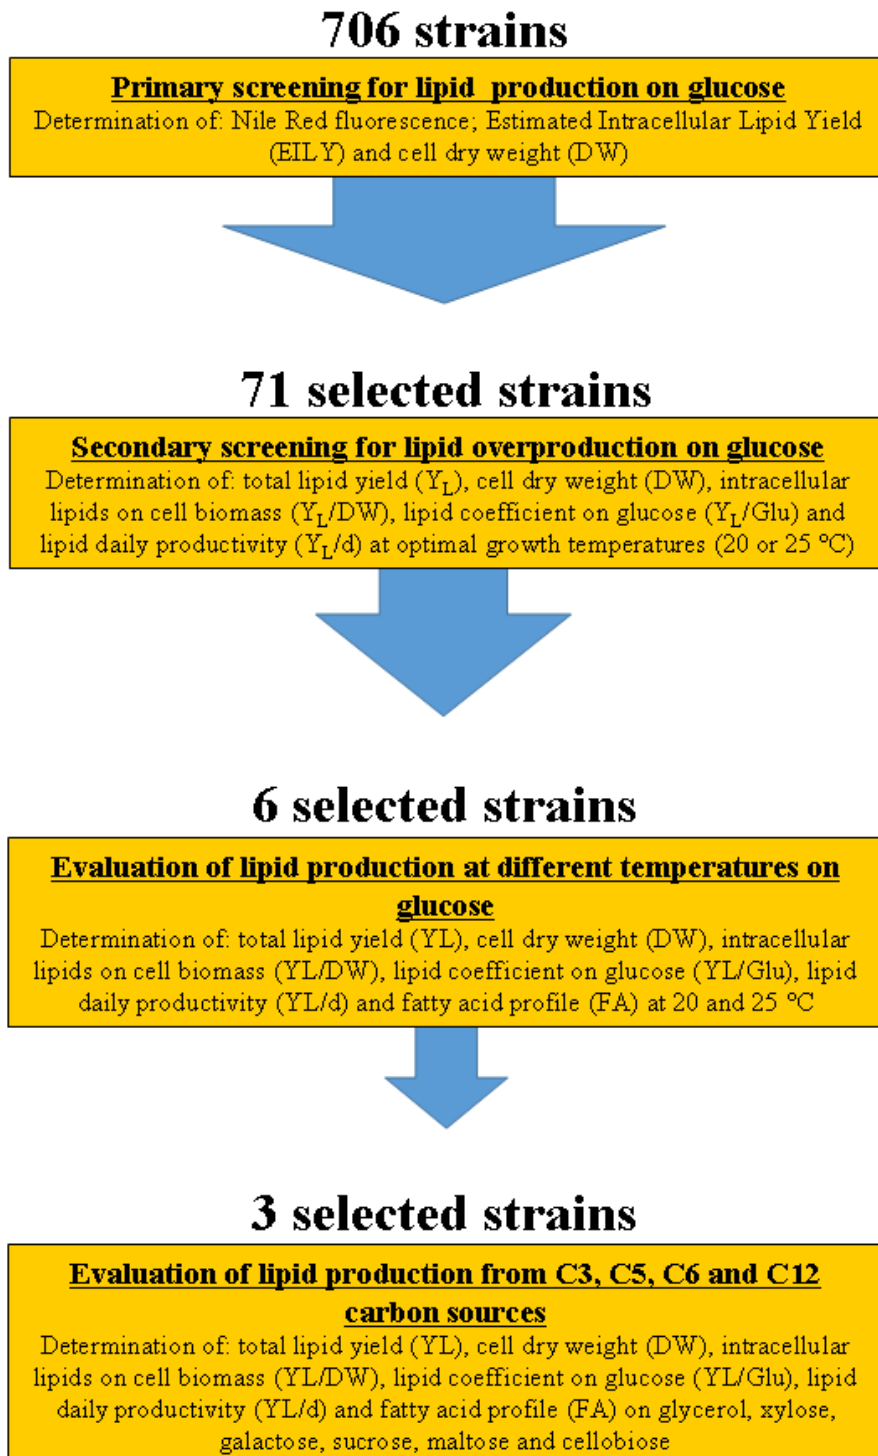

Supplement: 13068_2016_672_MOESM2_ESM.pdf [file 13068_2016_672_MOESM2_ESM.pdf]
