# Supplementary material for: Study of Holtermanniella wattica, Leucosporidium creatinivorum, Naganishia adeliensis, Solicoccozyma aeria, and Solicoccozyma terricola for their lipogenic aptitude from different carbon sources
Source: PubMed Central journal article supplement (PMC5126845; doi:10.1186/s13068-016-0672-1), 2016-11-28
Supplement: 13068_2016_672_MOESM3_ESM.pdf [file 13068_2016_672_MOESM3_ESM.pdf]

### Additional file 3

A few examples of micrographs of yeast strains before and during fluorescence emission.

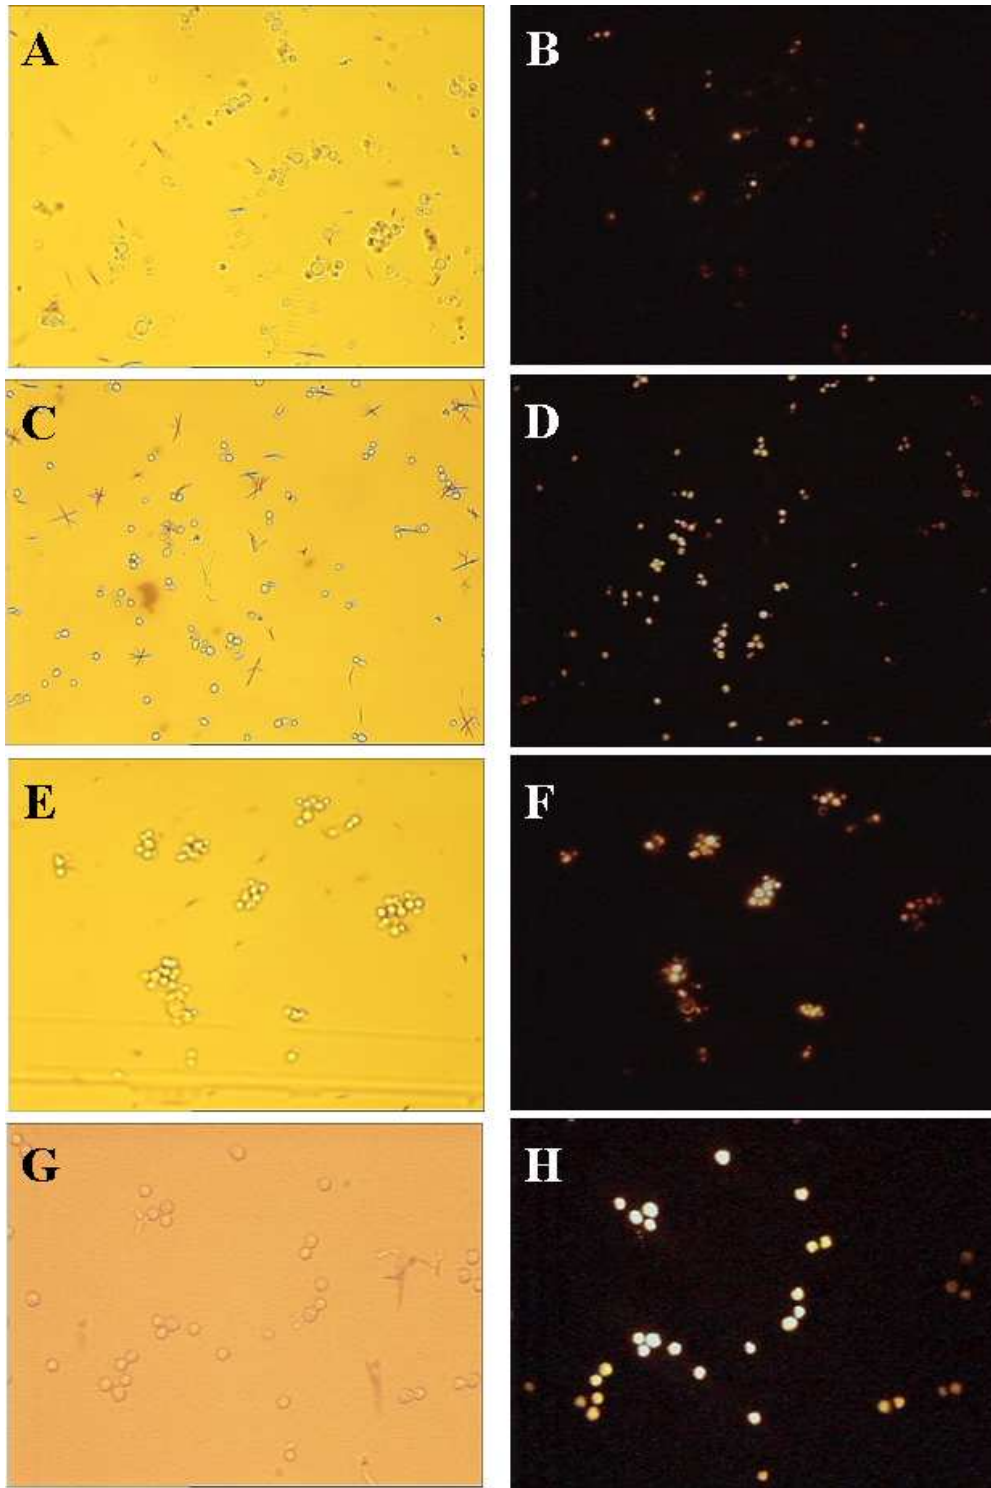

Increasing intracellular lipid yield evaluated by Nile Red before (A, C, E and G) and during fluorescence emission (B, D, F and H) photographed with a Wild MP 552 camera (Leica). A and B = *Debaryomyces hansenii* DBVPG 3326; C and D = *Zygosaccharomyces bisporus* DBVPG 3018; E and F = *Magnusiomyces capitatus* DBVPG 3250; G and H = *Naganishia albida* DBVPG 4919.
