# Supplementary material for: Study of Holtermanniella wattica, Leucosporidium creatinivorum, Naganishia adeliensis, Solicoccozyma aeria, and Solicoccozyma terricola for their lipogenic aptitude from different carbon sources
Source: PubMed Central journal article supplement (PMC5126845; doi:10.1186/s13068-016-0672-1), 2016-11-28
Supplement: 13068_2016_672_MOESM6_ESM.pdf [file 13068_2016_672_MOESM6_ESM.pdf]

## Additional file 6

Time course of lipid production of *Leucosporidium creatinivorum* DBVPG 4794 (grown at 20°C), *Naganishia adeliensis* DBVPG 5195 and *Solicoccozyma terricola* DBVPG 5870 (both at 25°C).

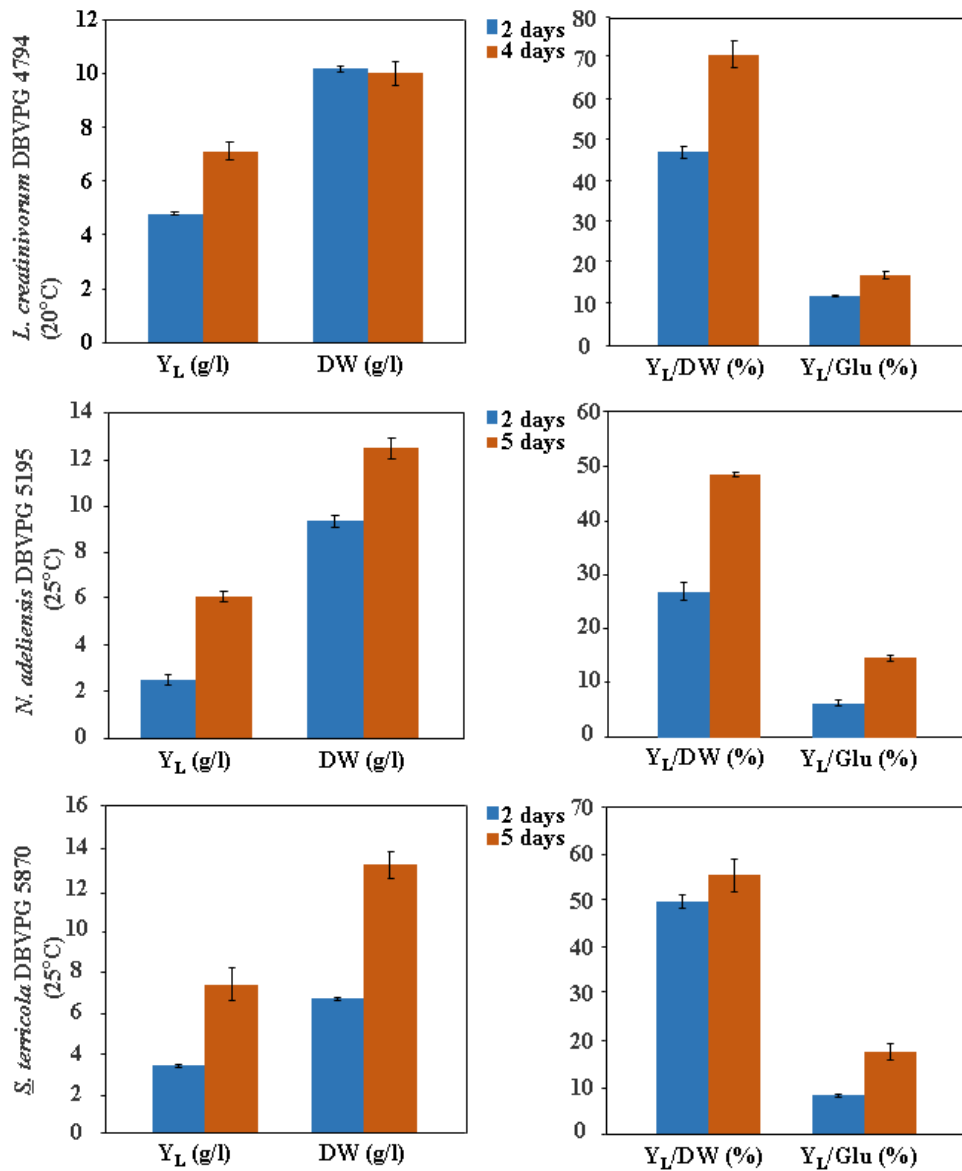

Y<sub>L</sub> = Total lipid yield; DW = cell dry weight; Y<sub>L</sub>/DW = total intracellular lipids on cell biomass; Y<sub>L</sub>/Glu = lipid coefficient.
